# Elevating the status of code in ecology

K. A. S. Mislan<sup>a,b,\*</sup>, Jeffrey M. Heer<sup>c</sup>, Ethan P. White<sup>d,e</sup>

<sup>a</sup>*School of Oceanography, University of Washington, 1503 NE Boat Street, Seattle, WA 98105, USA*

<sup>b</sup>*eScience Institute, University of Washington, 3910 15th Ave NE, Seattle, WA 98195, USA*

<sup>c</sup>*Computer Science and Engineering Department, University of Washington, 185 Stevens Way, Seattle, WA 98195, USA*

<sup>d</sup>*Wildlife Ecology and Conservation Department, University of Florida, 110 Newins-Ziegler Hall, Gainesville, FL 32611, USA*

<sup>e</sup>*Informatics Institute, University of Florida, 110 Newins-Ziegler Hall, Gainesville, FL 32611, USA*

---

**Keywords:** code, software, data, publish, reproducibility

---

1 *Introduction.* Code is increasingly central to research in ecology. From running statistical analyses  
2 for field and lab projects to developing software intended to be used broadly for modeling and data  
3 analysis, most ecologists now commonly write code as part of their research. It is important that  
4 the communication of research results addresses the fact that code is now a key component of most  
5 ecological studies.

6 *The role of code in ecological research.* The transition to a greater reliance on code has been driven  
7 by increases in the quantity and types of data used in ecological studies, alongside improvements  
8 in computing power and software [1]. Code is written in programming languages like R and  
9 Python and is used by ecologists for a wide variety of tasks including manipulating, analyzing, and  
10 graphing data. A benefit of this transition to code-based analyses is that code provides a precise  
11 record of what has been done, making it easy to reproduce, adapt, and expand existing analyses.

12 Scientific code can be separated into two general categories - analysis code and scientific soft-  
13 ware. Analysis code is code that is used to correct errors in data, simulate model results, conduct  
14 statistical analyses, and create figures [2]. Release of analysis code is necessary for the results of a  
15 study to be reproducible. The majority of code written for ecological studies will likely be classi-  
16 fied as analysis code and making this type of code available is extremely valuable even if it has not

---

\*Corresponding author

Email address: [kas.mislan@gmail.com](mailto:kas.mislan@gmail.com) (K. A. S. Mislan)

17 been refined to the highest standards [2, 3]. Scientific software is more general and is designed to  
18 be used in many different projects (e.g., R and Python packages). The development of ecological  
19 software is becoming more common and software is increasingly recognized as a research product  
20 [4, 5].

21 *Current standards for code in ecology.* Journals are the primary method that ecologists use to com-  
22 municate results of studies. Therefore, the way journals handle code is of import for evaluating  
23 the current status of code in ecology. To explore the current status of code in ecology journals,  
24 we identified journals through a search of the Journal Citation Reports (JCR) using the follow-  
25 ing search terms: “Ecology” for category, “2013” for year, “SCIE” (Science Citation Index) and  
26 “SSCI” (Social Sciences Citation Index) editions checked, and “Web of Science” for the category  
27 schema. We selected the top 100 results for analysis and, after excluding museum bulletins, a  
28 book, and a journal with broken website links, evaluated a total of 96 journals. We searched the  
29 author guidelines for each journal to determine if there was any mention of code or software in  
30 the context of scientific research. We also conducted more specific searches to determine if jour-  
31 nals had a section for documentation of scientific software releases, and if journals had a policy  
32 requiring the release of code and/or data for article publication. Policies for the release of data are  
33 interesting to compare to the policies for the release of code because there has been an on-going  
34 community push for scientists to release data once results are published.

35 As of June 1, 2015, more than 75% of ecology journals do not mention scientific code in the  
36 author guidelines (Figure 1). Of the journals that mention scientific code, 14% require code to be  
37 made available. Nearly three times as many journals (38%) require data to be made available. A  
38 very small subset of journals (7%) have created a special section for software releases or added  
39 software releases to a list of options for existing methods sections (Figure 1). These findings are  
40 similar to recent studies of journal code policies in other scientific fields [6].

41 *Promoting code in ecology journals.* Journals can promote the release of code used in ecological  
42 studies though a combination of increasing the visibility and discoverability of code and software  
43 and requiring code archiving. One way to increase visibility is to indicate code availability in

44 the table of contents of all formats of the journal and have direct links from the online table of  
45 contents to the code (Figure 2a). In the article, links to code prominently displayed on the first  
46 page will also increase visibility (Figure 2b). This article format has already been adopted by some  
47 ecological journals for data, including *The American Naturalist*. In addition, journals can require  
48 and verify that code is made available at the time an article is submitted for review or is accepted for  
49 publication [7]. Requirements by journals for data to be made available have been very successful  
50 [3]. Specialized software sections in journals go a step further in promoting highly refined code that  
51 can be used broadly for ecological analyses and visualization [8]. Communicating the availability  
52 of software in a well-described journal format to the ecological community highlights software as  
53 a product of ecological research. Discoverability can be enhanced by having searchable databases  
54 for articles (e.g. journal archives, Web of Science, and PubMed) which include an option for  
55 selecting for articles with code. This search capability would make it much more feasible for an  
56 ecologist to find, compare, and adapt code from multiple research articles for a new study.

57 Ecologists may not be aware of the steps needed to share code or the ease of doing so with  
58 available resources [3]. Recent articles provide detailed information on the best practices for cod-  
59 ing in the sciences and serve as essential guides for writing better code and sharing it with others  
60 [9, 10]. The incorporation of code into the review structure for articles is still an open question,  
61 but, at minimum, tests of the functionality of scientific code should be completed by the authors  
62 [5]. A critical step for sharing code is to put code in an archive that is open source, long-term,  
63 and citable, which will help ensure that code is widely available [5, 11]. Archiving options include  
64 code-specific repositories, data repositories, or the supplementary material of the journal itself.

65 Journals can have a significant impact on increasing the value of code within the ecological  
66 community. We believe that broad adoption of the suggestions to increase visibility and discov-  
67 erability of code, as well as requiring its archiving, will motivate more authors to share code. By  
68 fostering reproducibility and reuse, more available code can improve the quality and accelerate the  
69 rate of research in ecology.

## 70 **Acknowledgements**

71 K.A.S. was supported by the Washington Research Foundation Fund for Innovation in Data-  
72 Intensive Discovery and the Moore/Sloan Data Science Environments Project at the University  
73 of Washington. This work was partially supported by the Gordon and Betty Moore Foundation's  
74 Data-Driven Discovery Initiative through grant GBMF4553 to J.M.H. and grant GBMF4563 to  
75 E.P.W.

## 76 **References**

- 77 [1] Hampton, S.E. *et al.* (2013) Big data and the future of ecology. *Frontiers in Ecology and the*  
78 *Environment* 11, 156162
- 79 [2] Peng, R.D. (2011) Reproducible research in computational science. *Science* 334, 1226-1227
- 80 [3] Hampton, S.E. *et al.* (2015) The Tao of open science for ecology. *Ecosphere* 6, 120
- 81 [4] Rubenstein, M.A. (2012) Dear Colleague Letter - Issuance of a new  
82 NSF Proposal & Award Policies and Procedures Guide. Available:  
83 <http://www.nsf.gov/pubs/2013/nsf13004/nsf13004.jsp>
- 84 [5] Poisot, T. (2015) Best publishing practices to improve user confidence in scientific software.  
85 *Ideas in Ecology and Evolution* 8, 5054
- 86 [6] Stodden, V. *et al.* (2013) Toward Reproducible Computational Research: An Empirical Anal-  
87 ysis of Data and Code Policy Adoption by Journals. *PLoS ONE* 8, e67111
- 88 [7] Nosek, B.A. *et al.* (2015) Promoting an open research culture. *Science* 348, 14221425
- 89 [8] Pettersson, L.B. and Rahbek, C. (2008) Editorial: launching *Software Notes*. *Ecography* 31,  
90 3
- 91 [9] Stodden, V. and Miguez, S. (2014) Best practices for computational science: software in-  
92 frastructure and environments for reproducible and extensible research. *Journal of Open Re-*  
93 *search Software* 2, 1-6
- 94 [10] Wilson, G. *et al.* (2014) Best practices for scientific computing. *PLoS Biol* 12, e1001745
- 95 [11] White, E.P. (2015) Some thoughts on best publishing practices for scientific software. *Ideas*  
96 *in Ecology and Evolution* 8, 5557

97 **Figure Legend**

98 **Figure 1:** Most ecology journals do not have requirements or guidelines (as of June 1, 2015)  
99 for making code and data available. Ecology journals listed in the Journal Citation Reports (JCR)  
100 in 2013 were evaluated.

101

102 **Figure 2:** Recommended page layouts for: a) the table of contents of a journal; b) the first page  
103 of a journal article. The recommendations are for all formats of the journal including html, pdf,  
104 and print versions. An important feature is that active links can be clicked in electronic versions to  
105 directly access the code. The article titles and author names were made-up for the examples.

**Figure 1:**

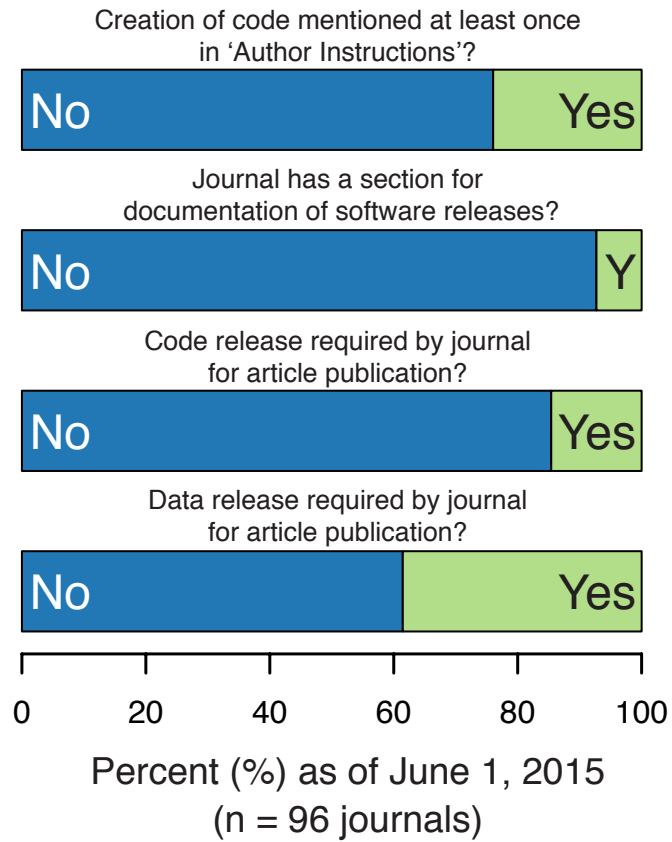

Figure 2:

(a)

Availability of code indicated in the Table of Contents in html, pdf, and print versions of the journal.

Month 20xx Volume xx, Number x pp. xxx–xxx

|                |                                                                              | S Source code available | D Data available |
|----------------|------------------------------------------------------------------------------|-------------------------|------------------|
| <b>Letters</b> |                                                                              |                         |                  |
| 435            | <b>Interesting article about complexity of biology: a response to Author</b> | S                       |                  |
|                | Scientist A. Name                                                            |                         |                  |
| 436            | <b>Interesting article about reproduction – a reply to Author</b>            | D                       |                  |
|                | Letter W. Writer                                                             |                         |                  |
| <b>Reviews</b> |                                                                              |                         |                  |
| 477            | <b>Article about animals and plants</b>                                      |                         |                  |
|                | Author O. Article                                                            |                         |                  |
| 487            | <b>A ground-breaking article in the fields of ecology and evolution</b>      | S                       | D                |
|                | Chromista A. Fungi, Protozoa B. Plantae, and Animalia C. Bacteria            |                         |                  |

**Clickable links to repositories**

(b)

Review CellPress

## A ground-breaking article in the fields of ecology and evolution

Chromista A. Fungi <sup>1,2</sup>, Protozoa B. Plantae <sup>3</sup>, and Animalia C. Bacteria <sup>2</sup>

<sup>1</sup> Pleistocene College, Department of Biology, Town, State, Country

<sup>2</sup> Triassic University, Department of Ecology and Evolutionary Biology, City, State, Country

<sup>3</sup> University of Cretaceous, School of Biological Sciences, Village, State, Country

**Prominently displayed, clickable, and permanent links to repositories.**

|   |                                                                                                                     |
|---|---------------------------------------------------------------------------------------------------------------------|
| S | Source Code Repository: <a href="http://dx.doi.org/10.5281/zenodo.xxxxx">http://dx.doi.org/10.5281/zenodo.xxxxx</a> |
| D | Data Repository: <a href="http://dx.doi.org/10.5061/dryad.xxxxx">http://dx.doi.org/10.5061/dryad.xxxxx</a>          |
